# Supplementary material for: Survey of Endosymbionts in the Diaphorina citri Metagenome and Assembly of a Wolbachia wDi Draft Genome
Source: PLoS One. 2012 Nov 16;7(11):e50067. doi: 10.1371/journal.pone.0050067 (PMC3500351; doi:10.1371/journal.pone.0050067)
Supplement: Table S1 — Summary of predicted ankyrin proteins in the wDi draft genome highlighting coordinates, sequence and representation in the closed Wolbachia genomes wRi, wBm, wMel, and wPip, and the draft genome sequences of Wolbachia from mosquito associated strains JHB (PRJNA32209), wAlbB (PRJNA81759), and wPip Mol (PRJEA52451). (XLSX) [file pone.0050067.s003.xlsx]

## Sheet: Sheet2
product			start	end	strand	wRi	wBm	wMel	wPip	JHB	AlbB	C. pip. Molest.	translation
product=ankyrin repeat domain protein			83203	84072	+				x	x	x	x	MFCTSEATKKLFKAIEFQNVSDENIAPEEAWNHFQQALKEGANV+NAFEDGMTPLMCIASAFVASTNEEQQSLELMAKLLVEHKKIDVNIKSKQAVIERRPKE+HDGYPVYEFEEREVLDRSPYLRCIYLDNSQPVNEGFIPQNYARAEEAIKTGKKEKNTA+LHIACMLGNVDMVKILLTHPKIKTNIKNYENKNPKDCIAEHVKEIIEPEFIKIEKRNQ+ILEPATQKSNCAYTLLLTGALAVGLCFVVDNPVPLAAAALLFFAIGCGCLYRANTVLN+DVNFSQVDFEHAK
product=FIG01207776: hypothetical protein			144252	145934	-	x		x		x		x	MLSGSNVDFRRRVVSDVGLRTQNQTTSGQSTTKLFKAIDDENLG+DFKRALAEGANVNAFDEGYTPLMTIIMGGDDSPTNLKMMTLLLQHQNLNVNIQEAKEL+NTALHLAFRMENRSFVQMLLRHPELNPVIRNDYEDRYGRRKSYTPKEYIEQIGREQEK+DFSHLTKEIQKAQTGKQLLNALSHGNFHEAKRLLNEEFNPNCWKRNFNGEIETLLSLI+IKSCLQGITQDNEEVLTKLLEHKDLDFNQIKPIPAIEQNPWVKQIIEQVMKERLTDAI+NRKDLGDVKELVEDHCFINRAIVNAVLGNVNNPSESIKNYLNEKFPASAEQPVANTHN+VQSEINDEFIAQELQRLENLEGELERTKAQLAEKEQELNRTVDERTRDTDKISQLEKE+…
product=inversin protein alternative isoform%2C putative			172692	174932	-								MPDYYEILGVKRDATHDEIKKAYHKLALKLHPDKLHKEAQELDR+LEKKKKDGELLSQSEEGQMAELKEKLGKFKQISVAYEILSDQTNKAQYDRGENVSQQA+YERGSSWEKEMRKFFEKADEIEKGIHKLNKKALKTEEKMNQVEIFNKIYNIYFRKYSE+LSREQAGKLPKGIEQTNETGEAKETEGFEEVKKVELKPEYIITILGLLGKIESGNLED+CSSIIKEVTIDTNDIVYLVQIAIAYDRVEIFKLFEGRIEISPNDILNYAYKYQSEEFL+NYFFNKYLDKLDINYKDEEENTALHHVLEWFVCGESKKYQDLVESLLSKGARLDVKNK+KDKTPFDLLVNYAQQFFSKEEVIERLNNVSALLSCCKIYELKKLEGTSALNELVEFAA+…
product=Chaperone protein DnaJ			186540	187754	-				x	x	x	x	MKFWVTFNLTYFSGEFIVSRKEALKILGFELSDAPSEQEIKSAY+RKLALKYHPDKHSEAAKKQNEEKFKKLVTAYEFLTKENIEGVTNLTDGNLNGIDSPED+LRFYLSRALYNRDIKFLEKLFSKFKSSKDGRFGDYINEELVFIYFPLSIALMQAKDSR+NYSILRLLLENGADPNIKLLHNEASLHYYMVLDDSRIVELLLQYGADPNMLDKNGKNP+LFEAFLCDDDHTMEILLKYGANPNMLDKNGRRPLYQAINFDNDKREKYVELLLKYGAD+PNQKVNGSRVIEYAPYFINNGIMNWIKTLTLPYGNNDKVKRLMAEYGGVDRRYLRDQT+ILTCCCLIVASATFFSIASPLRYVPTAIFALAACFFIKNAVHAAFFAKEPSTEFTEAR+…
product=FIG01207966: hypothetical protein			206380	207693	-				x	x	x	x	MINTIDDDYGRTALIWASRNGQLEIVQYLIEEGANVNAESPGNT+TALIHAAVHGHLEVVQLLIANGADLNVKRKGQFPALTYAIVNGHTESAKLLIRCHLIA+NLNMSMPRLPHPTQIPELSSYWYDCKDELNKMKEEDSELYNFLVSKGIDDQVRTWKES+ETVQNVSQDRLNIEYSIYAKDLTGKIELVIFFLNNREIINSLSRYYEVGIKTIDQVKR+LLDRFTREHVEFEIEIVPAQLNFNTKELQPSKLKTLSFAQMINNHAGLFSAAKSGQLE+TVRYLIEKQKEDIDAADDHGRTALMWAAGSGYLEVVKYLIETAKANVNVKDNYENTAL+NYATRNRHLDVKEYLKGYIQKELRKKYVCIGVSGTIGYVAGMTISCSAGAAIAVCAAS+…
product=11L protein			243056	243634	+	x		x	x	x		x	MRLLIKKGAEVNARDKNGYTPLHCAVFAKSLENVKVLLREGAEV+NVTQYVTGCTPLHSACKIGGVEIIKELVKAGAEVNQLNKYGATPMYYIWESEKYCLCD+SKESEKASKFLREKGGVTKSRELTCYGIERLVGEIADMLNGSYMPELKIIEIGEIRKR+DKSLIKEECENLASKIMSQVSEMIDEVAKRNT
product=phospholipase A2%2C group VI		pk2	243673	244170	+	x		x	x	x			MLKLGKFNKSAKELLENSYKNIYARDENGRTALHYAINAKTVKL+LVEKGANVNAADARGYTALHLAVTEKRLETVRELIKSGGNVNAEEYGSKCTPLHLACM+VGEKEIVEELVKAGGEIEQEDTFGMTAMDYAKNSKEITKVLKKEXDRIEKLFEQQSGK+SSMRG
product=FIG01207691: hypothetical protein			250837	252318	+	x		x	x	x	x	x	MSAKLSLELIECLINQPGVDVNVRGLNGRTPLHYAVEINELSMV+ALLLNRKNINPLIADDDGKSALSCAREEILQALINHKYGSEGDSLLHLAAMLNEANAV+RFLLNKGVNVNEQNALLHTPLHLAAGAGHEEIVEILIREGNADKDVLDVRNHAAIHYA+VNNKKLEVVKLLSNLGANVNIAGSGRNAMKLSSLHVAISSSNYDERDLCLDIVRCLIN+VPNAGVNLQDYENKTPLHYAERLKTIEVLLTREDIDPLIKDDNGKTPFCYAKEANRLD+IVKILASNRYGADKNSLLHLAARKGYEDLIDGILGEGVEIDAVDESGKTGIYVAAKHG+HFNVVKLLLKRGADATDVFQYAIITNNAKLIELLSKEKEIVLFGRQKNFPTFHLLSNK+…
product=FIG01207691: hypothetical protein			256096	257415	-	x		x	x	x	x	x	MVLDYAKEGKKAEILQALINNKYGSEQDSLLHLAAMIGEVNAVR+YLIGKGIDVNARNTLHHTPLHLAAGIGHENVVKILVKEGNAEIDVFDARNQTPMHYAV+NNKKLEIVKLLLKLGADVNSARIGQNSMKLSPVHIAVSNTNYDERDLCLDILKCLIKE+PNAQVNLQDYENKTPLHYAERLKTIEVLLTREDIDPLVKDDSGKTPFDYAKPEIKKAL+MSSKYGSEKNSLLHLAVQTGEIELVESILKEEIDIDISNNKNLPPVYLAAEKGHLHVV+KLLLKKGANYTPVLHLAIKSNNLELLKVLFTEKNGSLLCRDTVINFPTLHNKYIAQRE+IADKRMKKHNNIICIYTTVSAIAVAVYIGLITTTISSAIIFATITGVFALVIAIMISE+…
product=FIG01207691: hypothetical protein	63	separate likely due to frameshift	257405	257596	-								MSANLSLELIKCLINQPGLDVNVRGLNGKTPLHCAIEFDELSMV+DLLLTKKNINPFVEDNDGS
product=ankyrin repeat domain protein	689	no pseudo	257851	259920	-								MLKTSHSVDYFKQAVNRSELIKDTLSSSSQQIPIDLDLPEDFII+GESIGEGDCFFDAVAQGLNQLKPLGTFTAKSLRKICKIFAKSQFGLDSSWLTEALKND+GGSISSYVQRIEFTADDIKKGYRAIDRLKLTTATWGLPEIEGRIICIVYKVRLHFIKE+RITCNGGNVITHHLIDREGYQKGALDRDILNKEVYYRGDTIHIINRGKFHFEPILRKQ+MLPNCYNIRPSEKKLDSESICFQQNSEAEMKDVTDNQMDYEYYKESSPGIEVLPTEST+IGATVDYEDRLSNEELQCVRSQESPGVTRSSSIGSSSTSTDDEEMFSCISITSDEIKE+KMLFFVRVFVKVFEEKYSQISQEVRPDSKILKTGKAVDECTSAVNDTIAPGLFKFALQ+…
product=FIG01208142: hypothetical protein			264551	266944	+				x	x	x	x	MVMSYEQWEIILGIVDQKEDLSKDNVIEKIKELLNKARILERKE+VLRMLEGISHKLEISNEIPIVQETPEPLKKRLKVQHIPQTLEKSEKILKEQGVSDAQK+ILKRVLKKLGVQETSEKSKAVTTEDVLNVRKTSEKMPVMLDTQKILEAIEKLKKASKD+VYHEWKKARFNVNYWFTLNYDIHSGYDQYGLLCLAMDFNLMNVFNALCKAKGINIHSK+GPFSQWNVLHWATENSNAKMVSELIKNGANVNSMDSSQRTTLYQPAANGDIEIIKILV+KNKADVNAEDLARLTALYEAAGHGHKEVVKYLMKNGADVKRNGALKLTPLHLAVANVN+KEVVDCIIENDENIGKNIEKVDVFGWTSLYWAAAKNDTPILKSLLHAISRCRASVDIE+…
product=FIG01207917: hypothetical protein			271198	272574	+				x	x		x	MNPEELKEILAKKERVNAVIKDLVDTVTKNDLEKVKSIFEENSS+IIRDVVTEVNSQSGTNLLKCSTNNKMAEYLIEKGISFSAAVTKAVKRRDLESVKSICQ+INSLIAKDELSQNPEPLESATYDHKFNDKIARYLIEQGANPNATDHLGRYLLHLQTAQ+GNFEGAKALIENGADVNLINQEVKSYQNLIIGGSALKGQTALNFAIRIYYRHKDIDDQ+KSDKTLKFISYLIEHKANLNIKDCNEMVPLDIAIFHNSPKIVELLIKAGADLNVGRKK+AEGVLKYAITEGHIDIGKATIRYILEHDSHWLTTSNKPDLLNDQQELSNYWDEYKAQV+KEPHDIVEDRIDLTGDGSTRPIMRTVSGFLDHESRKNLVKSSFISSAEAPENFCPRKL+…
product=FIG01208654: hypothetical protein			275250	277790	+	x		x	x	x	x	x	MEYERLLKILRTISDLNENNIIERVKEELEKEDPDTYKKWQDNG+FNINYRFDDQNTFLHIAARNDLVKIAELLIKKGGNVNTADEDGWTPLHFAAACGSIGV+VEIFIAHKVSVVVADEDGCTPLHCAAHNGHKEIVELLLNKGANIDAVNKVKITPLYAA+VRFGYTEIIKVLIANKANINAADEDGCTPLHCAAINGHKEIVELLLNEGANVDAVNQV+ESTALHYAVSSENCQMEIVKAILEKGASVNVVDEYERTPLCWAIRNGNLAVVEVLLKE+GADPLLGHKSFNTLKLLVESIKNDFKHPKKAEETQQQEDDEYELIKYSLLHDCSLIDN+IERSAFSKLIPMWLADGSNLTENQKELNRKFLTIIKDFPHITYQDYNNDIKKIKKFLL+…
product=ankyrin repeat domain protein			295972	296505	+				x	x	x	x	MDKLGQDTKNKLHFWWLITVIVCIIATYSYMRAKAVDNYKTILR+IASQNCNLETVKFSVKNLLDIDTHMPKLTALHYAAEGGCLEIVRFLIDEGVNVNIINK+YGSTALHNAAYYGDLRIIKFLLEKGANPNIINDDGKKPRNVAVLRSRHNKDKPYDQII+KLLAEAEDQYESTKSNH
product=ankyrin domain protein ank2			335555	336475	+	x	x	x	x	x	x	x	MEIMTLDDFLKMLEEINDTSGLSKNNIVERIKIKLERIDLRRWE+DSGFNINHIFTTHSDLDPVETTLLHFAAKSGYENIVIALIEYGAYVDAWDSDGCTPLH+FAAEWNHKGILDILIESGANVNAWDNDVCTPLHLAAEGGNESVVRALIACGADVNAQN+SDGHTPLHFATKSGYENIVIALIEHGAYVDAWDNYRSTPLHFAAESDNEKIVRTLIEH+GACVNVWDSCGRTPLHFASDHESIRDILIESGAYVSKQNNNRYAPLHSAIEWGCKDVI+SSLSGNASPRTEMAVERVEQITLAGRLELF
product=ankyrin repeat domain protein			343928	345124	+				x	x		x	MRDSNYVREPIALFQKIKENKKSSDLLYNLKSAYPEKLKIGAAI+KTGDCFFDSVAQGLNELNIKPDHYFTAKSLRKDCADYVEQHGEQDSWAYKAVIKDAAI+GGYFVALEGPYGPIQNPKTKINMIDEKKTFHEYLKNIKNMATGAGSAPIWGRLEIEGK+MICEKYKVKIEVIALEEEPIDGRYITTGEEGEGDKVVRIVNYMRHFVPLLSEISEDIT+ESQPVSNEEIFGEVTEASASDQSEQEEQYNIRTSKAAIAQDHKEQKTQKERIDTSASE+PIHTDTVITISHPHEQKTQQEEIQKKLINSYRREAIYSIAAVITAIAFTASAIAAVFT+QPMPLACFAGVALVVACICAYQLTQSHQDINELKGKVGENNTFTFLEETGFKIYSLID+…
product=ankyrin repeat domain protein			349764	351104	-	x		x	x	x	x	x	MACEEDIHQLVESGFDINSKDVSGVTLLHKFTKEGDLVGVKSLL+EHEADFNVVDNENRNPLHYAIMHGHKKIAKLLVNQLTINSRDKNGFTPLHLATLQDDT+ELMDFLIAKGAKINEKDAEEGYTPLHIASLYGSKKSVQILIDSGANLECEDNNFRTPL+FLTIYQCTTHYESRAEIIEYLIKKGANIEAKDAENNTTLFLAAYNNKMQLVKLIVKQA+KARLKEFICTKNKHGFDALDCAIEHNNGKMVTFLVSKGIEADDQDCIGNTRLHKASYN+GDTKAVKFLLELKVNVNAVTRCNRTPLLLAAKKGHVEIVRMLLAVKANMNICDQQGFT+PLHLTIQRDYFDIAQLLIEKGAIKCSKDYTAIGMFIDKAHSKKNIEENYKKFCRFLML+…
product=Cell division protein FtsH %28EC 3.4.24.-%29			351355	353136	-	x	x	x	x	x		x	MTGEYESLEKVLRTIEAEKDLNLNNIIEKIQEELKKQNQDLHEE+WKKVEFDVNHLFSQELTLLHVAARRGFENVAKVLVAVGADVNKKDSKCEKIPLHLAAE+NGHAEVVEFFLNRGISVNVMDKEGNTPLHCAANNGSRKTISILIRKNADPWLKNFHGK+TAVNIYAFEHPNGSGYLMQLKKAKIQGYIVFGSMLLLGAAMATSIVAVNLIVPDVPVL+KVLLCVSILYAFASIAKYITYKAAELDAENEIKNGQDSNIINIEEVSDEKKSVNKATH+SKELNDLVCAIKGSSRIEIVDPDKQKKVTLDDVIVSDEVRKELKMICGHISEKKKKAL+EMLSCKMPTGYILYGPPGNGKTLIARAIACEANAKFISVSGSECMQKYAGQSAHYIKD+…
product=ankyrin repeat domain protein			454980	455129	-				x	x			MYLALLKQILSIVNRENDLNGNNIVEKIKEQIKKEAHLLMKNGR+GKNLI
product=FIG01207723: hypothetical protein			497388	498461	-				x	x	x	x	MFSTQSLPVENILLHQAAYNGNINEVRLLLNVKTDINIKDKKGF+TALHFAVYSGHLDVVKLLISKEANIHARTTKGSTVLHFAVAAKSKAIVEELIKAGADP+NIKDCTDGKTPLHIAAQNGLVEVVKVLLNTQEIEIDAKDNEFGITALYLASQNGHTEI+VELLISTKNADVNIVDKKNNVTPLYLAAQNGHAAVVKLLLDNGAKVNGCDTSMNPLCV+AIDNGHDEVAQLLLSVEGVDVNIGNQLGNTPLHIAAMKGNEKMARLLLEKGADPNIKN+LSGDTSLQAAEYIRKISWHDNPPNVQGGFFVLVGSNGIYSFQQFYEQKKIMELLVQHI+KDSRPSSSVDEIDVSVQQSSKIR
product=FIG01208515: hypothetical protein			511091	511642	-				x	x	x	x	MYQEQENSVSNSRFTLPHIELSLRAKQDTNPTDNEGLVPLHYAA+CGNRLEQVKLLLKNGANVNAVDNYGFTPLHYAASLNCKEEVELLLKNRADIDVKNHFG+ATPLYLAVQGGHENVVKLLLKNGANINITDNSSKTVLHLSVLKGHTEITKLLLGDMES+PSTSCSDISIEGLQVTSVVLNKT
product=Ankyrin			511770	512771	-						x		MNEREQRELDELLMNSSKGENIQQITELIEAGANINAVTTVQKE+TPLHIAVRYVHKEVAELLLNKGANVNAVERRKWTPLHTAVKSGKVEVAELLLDRGANV+NAVDNIDMTPLHFAVKYVQEELVKLLLEKGASVNAVDKKGRTPLSIVATGCYQGYCDK+PMLVRTIIVYAVLHSGITMKPECIVNNSELSEFWDLCKNEVSGRLSNSTISLYQFLRE+NDKNKLAGYLFDQNYDVKRYLEEKQYEKDFPIYANIITGQLHKAMKRKDLLYRSDIVM+NHSVDLKDFPQEVKSKITNCLTNEELRNVIRAPFSIPSRNLDNPSAEQLQAAAQAHN
product=ankyrin repeat protein%2C putative			535257	535529	+		x		x	x	x		MTIKFAKWKRVLSTVNGNKDLSKDSVIEKIQEKLRRFPKDYNRW+EKDNFNIDYLFRINSDYNNSNEEVALLHLPRSFYLLDMGYYISLLT
product=FIG01208654: hypothetical protein	209	in an island relative to wPip	535613	536242	+								MAAKLGNIKLAKVFIENGANVNVRNECESEDTPLHCAVCFGHIE+VAKTLIKNGANVDAVNKNGNTPLGLATQENQVKLIKILKESGTNVDEVNKNVYIPLGC+AIQNYNKEVEASLDDIIKESLKEKEKIQQVTKNVIIAGGTTALLXTAIAAVLFATETI+AIPIAIAVVAVIAVALAVGGATYMXXKXSXKVDEAVLTNVHEISVLTAS
product=ankyrin repeat domain protein			546224	547204	+	x	x	x	x	x	x	x	MFMKYKAFFILLIVISNLLAAEQPEENKNESSINQEDVSKSNTD+AEKTSPLLSELKESTDPTNVINEEVPSSNQTNLQSEEETNIKDTKALTSPLSEEKKEE+PEEKKISHNNQTNLQPEEEISKKDTELSTSQLTEKKKEEQPDNITPVNKENEESEKWT+KLNKEIKKHKSKSIYKRQYDSLNEHLPKTISTDDYSKQFFYCIKKGNLICLRGVINKL+EKIGLTIQEILRFRNKLGDTPLIYAVKQGEIDTVRFLLLQGADPRVVDNNFKSPIEIA+IERNQINIINAIAEMMPYLLEDKEINNQENSEMYNFAIKTKENTCDAKDN
product=FIG01207578: hypothetical protein			549849	551930	+	x	x	x	x	x	x	x	MVIDSSVLVSNANKLDKCINKNEKPEQDKKDKQLYNIIERKVKK+EKHKHEKPRSRDGTLKECKRLLKEGASPEVLIKLEASLREQEKYYRYYIQCFLPVLGE+VIERSKRISNETKNQVISEITKSCLSRYNEQDSGYGSDFEDEINGISDSDSDFKDEIN+GISDSDNDVQLLNAIQNGNNRKFRKYLKDCTNVSGITDEKGNNILHLIASLKKKQKCK+FLGTLIKTITKEDLAQLVDSENQEGKTPFQVALINKIIKGKHNSQTIQDNDNTLKFLT+KLLEYGASSDNLGLSTKELQYLKEEQKTYYCDFLEKLAKSVKTPELKSEIRTKTKEII+PHTINTPDSNDNYQLHLAIKDKNEKSFKELLQKGADINLKDANGNNALHHIALLRGKQ+…
product=ankyrin repeat domain protein	89	near contig boundary	562168	562437	-								MYTDEQNKNLVRVEVKDQERLKKLKDCGEEIGKICLLGGYSVYN+AIERGYFERPLGIFQGERLQSGEKVSHVDQLQRRKNNEVYQIRSP
product=hypothetical protein			580657	581688	+				x	x	x	x
product=ankyrin repeat domain protein			596662	597831	+				x	x	x	x	MKKLERLRKNLFAAIDELNIKKVKRYVKKARYINKEKEIINGKK+DGMAPIHLAVYKGSLEIVRFLLKNNANINAVSDGCLVPYSYVTAMNSKTEIKEMIYHC+TSSTNSQVMQGFTALHLAFFYCRLDIANFLLNNKAIDLNISSANGKIAFEVIPGYESL+CSDGCDIKKIFLAVLRFHKNNCTELLLSARINTKLKLEAGDTTDAASSTASLSLSPTK+AIKMELEVSNTTDLASRTVNSSFTLIRENFEEVSSTASNAVKPSSFINSIFSWMGTST+TAALSSLFQSAPALPSAQQSVDHLDGSPIGSSQVDFNGTALLTDVIVRKLTGKKYSKP+LEDSLLTIQEIRERKLNTIEKNFETALSKCEKLYQCPESSLSNLTISKGMHQKSL
product=ankyrin repeat domain protein			601143	601730	+				x	x			MVTKTEVEKWRDGLRSAVKERDFQKAEEYIREGKKHTTNVINSK+DRNGNSPLSIAVSKQDLEMMGFLIENGADVNIEDFFRVPPIYYAVTKGTTEMIELLID+KKASISGYFSYAGEKRTLVGWAIDENSPKKVEVLLKHGASPNSKFDFYDDSQDSCLHA+AIRRDYKKIVELLVKYKADVNVQNERGGNTYIFGY
product=ankyrin repeat domain protein			601684	602325	+				x	x		x	MFKTNGGETPIYLAISSKRPKIIKLLYDNGADIDNVKNIRNETP+SDYVKLFYSGKTIKEIAAEAESANVNSEDITPAPSSAVRPSSFINSVFSWMGTSTTAA+LSSLFQSSPALPSAQQSVAHLTGSPIDFSQVDFNGTALLADVVIRKFIGRKYSRPLDD+SLLTLEQIRERKVSAIERDIKMVISEFEKLDQCPRSLLSNSTISKGVCHQKSL
product=ankyrin repeat domain protein			631361	634798	-		x		x	x	x	x	MKFKTNSEYYKSQTLIKKLFPNKESIVINDQLTIEVKYGGLASY+TPEYIKQTVKDAYGAWSDNFYSQKSVHSGPVKLQLYVLKNYDDYKAHIKELSGGKDHR+ELWGGGTVRAHEADGTIAKTFIVGDVNGLLCAKSKILMEKMSDAFLEYSTGNMETVPE+VLRTGMKLFMWSYDAAKKESTRDMHYTKEAYNKMHESGHDTPYKIASMSNDYRISDCL+VTFLQEKHPQFIKQLLTEMSFNRVEAISKFKHLLNNSEVEKEFKQWMDVKSGDKIVAD+LVPDSEVMTFGEHKLQINIKYDDEELTQSKLSSVKNAIESTIKDFDSAFGINNSQPWH+NIPNKVNVFVFNTKSDYENYLKELNVNYKGASGLTVQGRGSEVHVYFYLQDQFDDSCK+…
product=FIG01207574: hypothetical protein			638490	639212	+				x	x	x	x	MQEFLNKNIEIPIDKELFKSALFTKDIVDIRKEMVYLILQHCIV+YDSTRSKKEEILSFKNVMKILDEAVNKFVTPQYFYRLINFRDQSGNTLLHQAVINNNT+DAIEALLKYGASPLIKNKEEKIPLDLDQEEKTREALIKSMKDQAQSKKESARCNSLIG+IIPGVFLGIGLGVGGALVPSMTIILCALAVSALVAGIAVGVAIYFLSQDYKQAKSIEE+AVNPQLSSVEHEKTADNKAVLG
product=FIG01208336: hypothetical protein			639691	641085	+				x	x	x	x	MKGEINAAANFQSEDFVSKNTDFDCLANPISASNAKLENSVKAK+DKKNEAPFFSRRGSSHVLELFSNENVEIHIQDKMPCAARSESGIAGIFRGIAGLFKGR+NSMNVTLYQSKVQRSSAIDYSTTESIGSRLLNICKGEEDISFDQEINFLYKEGCLYDA+LLLQEEKNQDTPLHLAIKKNHADFVKKLLCILKEPYRANEFYKHKYFQHKEENEKPLF+KVINTKNKDGKDAITLTIEGNNSECISALFNYLTDKNINRRKDVESEYTPLHEAVLLN+KNEAIKELLKSKDIDTELIDKESYKAYNYTNNKEAIELFIEHYSNKISKLRIKLEDNN+KKLARIKCVLNKTKLTCVCLAAFGSCFRMYRNSHDIINEEVSEDMLYYSLALLANTTG+…
product=FIG01208601: hypothetical protein			645139	647592	+				x	x	x	x	MGDWNLSAGLMSPAVDTAEKEKERRHSRDSGNESQEEVSVDNSD+TEDTPSNGANTLKFQLTQSLLSQVKASENNGDANSGKQAYKDLPRMDFVINGQVIDKN+FVSQLRDKCNQNDQRQIAKHVFTKMFEHAKAEIPNDNLLEELINSCNQAGYDGSLLMQ+LSPIFLGHDLQLPDANDRHIEIVCSDQDSLNIKYCPNMPVKQLDKEICRVDAILEFTL+KSQDGKVEYEDGKVTLTIPEKLKNYKVDGKSLLDDIKMHFEDVDNAIIESLLENIDEG+QNSFVVDLSTQVNSDSFDIIPEDTVFDLGHIPELVKKAVDDKDVNALADHIGFFQDHV+THVSSKEGLPVVEKTLEIVSGFTKEQSKPWRCYPTVPIASHIYSVKQQYYDGYISQEG+…
product=Alpha-latrocrustotoxin			659493	663110	+				x	x	x	x	MFKNTVTSVFKAKSSTSAKTLSSGLFVAGNVVMARAISEIDLSS+LQGNSEDKVNKQDLIIIYDYINKVTQEENYNICTNNLDCIKSRILAENISDSLAEKFR+QDGWNIISNDGSSLLTVAIERIRKEQKKNRNYDIHVEIAVSLILSMGRELIIKLENFA+DSNDKTLLHYLAESGKEDILCFVIENSNFDIKEAVRNKDRDGKTPLHYAAKSGNKECL+KILIENEADFSCTTNNKTELHYAARSGSPNLLEYLKEILTAKGIFDREKIKTDKYGNN+ALHYAVQSGNAECIKFFIDNQVQFLKNKYNENPFHKIVGNSETQENAINFLIEHLKFL+GRRKSEINQENVDGNTPLHIAAKHGNNQLMKLFTQSGAKIVQNKQGNTPLHIAIIHGN+…
product=ankyrin repeat domain protein%2C putative			763815	764669	+	x		x	x	x	x	x	MGIVDSFLIKSARNSNIRGVRLALSLHNIVNIFEKLFSRINPFR+NKGSFDLNNDQTLNRALEYAVTNLDHNVITLLISAGANINEINNSIGNVILQYKIASE+AMHYGDKDSLKDRKEKCCLVLGELIKKERKEILEILKQTESCDKLKEEVELKFKANSP+KKPPIIFEHDDILLLKEPIYDEVYDAKVSNSLEELSVSEESIYAEVYDSHKRSTENLS+LKDSGCSSISGEPIYEDVDDFSEQKKPTSLNHKEQPEPIYAKVDLSKKRSERQAKHIK+DNSGTYHG
product=ankyrin repeat domain protein%2C putative	79	possible gene fragment	764707	764946	+								MSKVLISQRVKTKAGFNEKEIRQNFERRDSGYDSGYDSDTKVEQ+KLELGSKAPKSEIGSVNIEHGVIGGCRYKITTLTV
product=ankyrin repeat domain 49 %28predicted%29	95	likely gene fragment	818988	819275	+								MFSIDQWLLDESIPLHTAAFRGEISKVRSLLNAKIDINIKDRAE+FTALHKAAYSGQLDVVKLLISKGADVHARTIEGSTPLHSAIMSENKTTVTL
product=ankyrin repeat protein%2C putative	142	contig boundary upstream	820045	820473	+								MNGIQQVKLNEQLFSAVLSNNIEEAERLINAGASVYSVDKHGRT+PLHHAAQRGYVDLAEYLIKIGTDVNSVDNFRNTSLHLTAHSGYIKDNGVWVNIEETAK+FRHKNTVELLLKKKGQILMQRTIRCRLLYILQQKEDIVIC
product=ankyrin repeat domain protein	114	not at contig boundary	820467	820811	+								MLEALLKKGAAVNLADDERNTPLHCVGGMGGGEDDKEVIKLLLK+AGADINLVNAEGDTPLSSYDLRSSHLSTDMKLMIVHITKLKAAGLFINQQNIQFTDEL+VRFWRGRNNNFL
product=ankyrin repeat domain protein	185	not at contig boundary	826275	826832	-								MIEGIKIDERNEHGFTPLHNAVHKDHKEIVEVLLQAGANVDAQH+LYGTPLHYAVSYCHKETVDVLLEKGANVNAVNTHGMTPLDYAKGQNVEVLLKAGGRSF+VKAFNKGIATAVKTALLGTAIAAVLFATETIAIPIAIAVVAVIAVALAVGGATYMMLK+PSTKVDGVAVLMDGRQEAASAARFA
product=ankyrin repeat domain protein	160	contig boundary	828234	828713	-								MAKGYETLKKVLNVINDKQDFNKDNIIEKIQEELERQDQDLHKE+WIDEKFDINHEFTSDHPKYLKFTLSRIAAEAGYANVLDALISSGSNISDKSRKGWTPV+LNLAAKHGHIGTVEALLKIVSQKCDIKKTRGKDNPTHYRNRAITGVCDRXXIGITTVX+
product=ankyrin repeat protein%2C putative			864278	865132	+				x	x		x	MAMEISNWHELLSLVNVDKDLSKDNVVEKIQNELKRYSKEYEEW+EKSGFDINYVFKDGEKVTLLHLAASCDLENIVNALIEKGANVNEKGAGGETPLHEITH+LKSINIANILIKKGADVNSIDMWGETPLCGAVLCDNMVMVDVLIKEGADVNVVDTFRR+TPLHWAALRGNMVMVDALIKKGADVNSVDMCGETPLHYLNRPAIKKGQIAAGAATLLG+AAISVALFAARTVTAEFIPIVIAVVAITVAALTVGSVTYKLLKPNTKVDGVAVLTNVH+EESASITL
product=ankyrin repeat domain protein			976062	976928	+	x		x	x	x	x	x	MTGEIEKDESPSLYSAIRMGDIEATELLIKSGANVNDNYERNRT+PLHIAIGYKQFEIAKLLINNGANVNAKTGNHGKDDLTPMHLAIFADTPEFIEFLASHG+ALINERESTEGHIPLHFAALYGNKSVIQALVDKGQNIEDIDNNGRTALFLAIRQCTEA+EDDSRIEVIEYLINKLKADITKKDNNNNTILFPAANNCLGKVVKLIIKQYIESFGRDR+LKNFINHKNKAGMDALDIALNSGNEKAIEVLSSYGADIENKVTPKITVEKPNSTLDGA+ESIEVVSPIKQK
product=ankyrin repeat domain protein	290	possible gene disruption, but still divergent	1062147	1063019	-								MAAENGYEGVVKALLTAEQVDVDRYFSALYFAAANGREGIVKAL+LTAEQISVSEKDSFGKTTLHWAAERGHIEILNTLLGKKASVNIKDNYGETPLHYAAKN+GHIEIVKILLAVDGIDINVKDKDEKTPFDLAKTEEIKALLLQIIEKTDDSSASTDSEG+DQEEDTEQEGNVQPVIQVEEKSQEIIVEEVSDVQIEDADNGHSIDIALTQNGVNPRSE+SSTNEEQPSSFFDNLLNIIMKPFSLIASFFGGFFSWLFGSDEPSTESDQIITPSNSGG+EELTNYQEGDNNII
product=ankyrin repeat domain protein	152	possible gene disruption, but still divergent	1063079	1063537	-								MNYSVRDIDSKLLNAAERGDIDKVKHLINEGADVNAKDVYEKTP+LHWAAEKGHKEIVEILLKKGANVNSVAFLDITPLLFAAMEGHEDVVEILLKRGADVNG+VESFSGMTSLWLAAQNGHESLVEVLLTAEKSILACILKHYVLLLEMAMKA
product=ankyrin repeat domain protein			1111237	1112559	-				x	x	x	x	MAIEKEKFFEIINEVGESSDLDEDNLLEKIKNELKGKDAGEYNK+FSRNFSKEHQFSIKISEEAAEDWTLLHLATACNNMLIVELLLKKKASVNARVKDGSKN+DGLTALHIATSCGHESMVKQLLSDDRVNPSLKSKNNTPREVVGNTENKEAILQMLEEA+EENFYVKHKKKTDISADVINSVKQYNTIRSSEQAPITCGSSDNIVSEQYLHAGVKNIV+EKFESPQRGSVTCSGKQTPIGESVSSDDSGLESEATFDTSFCSEINHDGTANEVDDQI+LESLQPQIQLQDRQIRKLEKPGKELKHVEKELEKLKSDLAGHETRLEIFDKLSEENQS+LKQKIKDLENENTTLNSELSKTKANKVLLEKTQLSFLKIASVNFVTMLTVSIIFSVAF+…
product=Putative alkanesulfonate metabolism utilization regulator			1117815	1118873	+				x	x	x	x	MDFENLKKILSAIDKDASVNKDNVINKIKEVLRREDTIAYQEWE+NKNFSINHTFIQSDPDAEFTLLIAAAAAGCEDLVNVLLDRHADVHVEDENRETALHHA+VYSRCVGAVNALLKKGADVNVKDRSGSTPLHYATIYKFIDVVNVLLKTGADINVKDRS+GSTPLHYATLSNHVEVVDALLAEGASVHVKDGNGSTPLHYAAKNGYLEIVDALLDRGA+DVYEKDSLQKTPLYYAIINHQEDTVESIKGFLKNKVVQGSVVVGGLVAMLGNFVTSTL+FITETMEITLTSVMVAIAVSASTALTSGYAKYLMSKFDNEIKEIKERQDVMEGRQSLT+EGWQNVGLQSIRIHNALS
product=FIG01207691: hypothetical protein			1159752	1161218	+	x		x	x	x	x	x	MADNLSLELIKCLINQPGLDVNVRGLNGKTPLHCAIEFDELSMV+DLLLTKKNINPFVEDNEGKTSLDYAKEGKKAEILQALINNKYGSEQDNLLHLAAMIGE+VNAVRYLIGKGVDVNVRNALHHTPLHLAAGIGHAEVVKILIREGNAEIDVFDVRNQTP+MHYAVNNKKLEIVKLLLELGADVNSARVGQNSMKLSPVHIAVSNTNYDERDLCLDILK+CLIKEPNAQVNLQDYENKTPLHYAERLKTIEVLLTREDIDPLVKDDSGKTPFDYAENR+PEIKKALMNNKYGSEKNSLLHLAAQKGVVDAILKEEIDIDILNNKGHSPIYLAAEKGH+LHVVKLLLEKGANYTPVLHSAIKSNNLELLKTLFKEKSIKLPDEIGRSVPIYYRCIEH+…
product=ankyrin repeat domain protein			1185161	1185628	+				x	x	x	x	MIICVVITYCYTKAKATDNYKTILQIASKNCSLEVVKFSANNLL+DINTQIPELTALHYASGAGCLEVVKFLIEEGADINTAKYEKWTALHAASYKGNLEIIK+LLLEKGANPNIRDTGGKNPRDVAVLRSRHNKDKPYDEIIHLLYNAEKKHESEQ
product=FIG01208376: hypothetical protein			1196075	1197247	+			x	x	x	x	x	MATARDYLSTVEKLIEKGADINTKNNYGDTPLHLAAISGHSEVA+EFLISKHADVNAKNKDGWTPLDSAAALSKSNGDWVPLSSAAALGKANIIKLLGKENSS+EILNLLEERIRKSEEILQLTLQDLQKQGVILSTRVRNHRSAGEEDENSLQNDKIGPNK+IGVTSGTSKPSSFINIFAYTTVDTIKGIFQFVSSPFKAAISMEPSKAITVQGIDNNGI+LLLLDVFIRKITGQKYISTVVQSISPLEAQGYALNIIEEFEKVVEQAALKSGISMHRL+NIDYMGVQKDITRKVMSGKFNEISGILNSHLEKACPGREVGCPGKLSEKKFNEFMAKF+NKGLDVILNQSTQQILHKRDDTLEVNNIEEQQGPRSYLNNASIQGHLTRNKVKLIS
product=Putative ankyrin repeat protein RF_0381	291	upstr contig coundary, not similar to wPip	1212464	1213339	+								MEKGANPNAKDYSGNNTLYSAVLNNHLKIVEVLLENTASPNAKN+DRGYTALHRAAFSSELRIVEALLKNGADVNKKNDDGRTPLYWAIIRGRLNIVKALLKN+GADVNEKNYDGHTPLYLALNTQQYDDKLVDFLIAQEVKIKGYNAEKPEYLPREKHCYW+DKCCSEIGRIKAKIIDGTTTLYVILTCKDNELTCYARKGVLQRALENSNYRNEFPIYY+NYLKDQCDKGIERLVLSNEIKDVFQGRQKLFLRKDEEKPDIITKLPTELPEAVDTHLE+NASMNNLKKALEINI

## Sheet: Sheet3
Table S1. Summary of predicted ankyrin proteins in the wDi draft genome highlighting coordinates, sequence and presence in the closed Wolbachia genomes wRi, wBm, wMel, and wPip, and the draft genome sequences of Wolbachia from mosquito associated strains JHB (PRJNA32209), wAlbB (PRJNA81759), and wPip Mol (PRJEA52451).
start	end	strand	notes	wRi	wBm	wMel	wPip	JHB	wAlbB	wPip Mol	translation
83203	84072	+					x	x	x	x	MFCTSEATKKLFKAIEFQNVSDENIAPEEAWNHFQQALKEGANVNAFEDGMTPLMCIASAFVASTNEEQQSLELMAKLLVEHKKIDVNIKSKQAVIERRPKEHDGYPVYEFEEREVLDRSPYLRCIYLDNSQPVNEGFIPQNYARAEEAIKTGKKEKNTALHIACMLGNVDMVKILLTHPKIKTNIKNYENKNPKDCIAEHVKEIIEPEFIKIEKRNQILEPATQKSNCAYTLLLTGALAVGLCFVVDNPVPLAAAALLFFAIGCGCLYRANTVLNDVNFSQVDFEHAK
144252	145934	-		x		x		x		x	MLSGSNVDFRRRVVSDVGLRTQNQTTSGQSTTKLFKAIDDENLGDFKRALAEGANVNAFDEGYTPLMTIIMGGDDSPTNLKMMTLLLQHQNLNVNIQEAKELNTALHLAFRMENRSFVQMLLRHPELNPVIRNDYEDRYGRRKSYTPKEYIEQIGREQEKDFSHLTKEIQKAQTGKQLLNALSHGNFHEAKRLLNEEFNPNCWKRNFNGEIETLLSLIIKSCLQGITQDNEEVLTKLLEHKDLDFNQIKPIPAIEQNPWVKQIIEQVMKERLTDAINRKDLGDVKELVEDHCFINRAIVNAVLGNVNNPSESIKNYLNEKFPASAEQPVANTHNVQSEINDEFIAQELQRLENLEGELERTKAQLAEKEQELNRTVDERTRDTDKISQLEKELRQVRQG…
172692	174932	-					x	x	x		MPDYYEILGVKRDATHDEIKKAYHKLALKLHPDKLHKEAQELDRLEKKKKDGELLSQSEEGQMAELKEKLGKFKQISVAYEILSDQTNKAQYDRGENVSQQAYERGSSWEKEMRKFFEKADEIEKGIHKLNKKALKTEEKMNQVEIFNKIYNIYFRKYSELSREQAGKLPKGIEQTNETGEAKETEGFEEVKKVELKPEYIITILGLLGKIESGNLEDCSSIIKEVTIDTNDIVYLVQIAIAYDRVEIFKLFEGRIEISPNDILNYAYKYQSEEFLNYFFNKYLDKLDINYKDEEENTALHHVLEWFVCGESKKYQDLVESLLSKGARLDVKNKKDKTPFDLLVNYAQQFFSKEEVIERLNNVSALLSCCKIYELKKLEGTSALNELVEFAAKYRFEGI…
186540	187754	-					x	x	x	x	MKFWVTFNLTYFSGEFIVSRKEALKILGFELSDAPSEQEIKSAYRKLALKYHPDKHSEAAKKQNEEKFKKLVTAYEFLTKENIEGVTNLTDGNLNGIDSPEDLRFYLSRALYNRDIKFLEKLFSKFKSSKDGRFGDYINEELVFIYFPLSIALMQAKDSRNYSILRLLLENGADPNIKLLHNEASLHYYMVLDDSRIVELLLQYGADPNMLDKNGKNPLFEAFLCDDDHTMEILLKYGANPNMLDKNGRRPLYQAINFDNDKREKYVELLLKYGADPNQKVNGSRVIEYAPYFINNGIMNWIKTLTLPYGNNDKVKRLMAEYGGVDRRYLRDQTILTCCCLIVASATFFSIASPLRYVPTAIFALAACFFIKNAVHAAFFAKEPSTEFTEARACPEISK…
206380	207693	-					x	x	x	x	MINTIDDDYGRTALIWASRNGQLEIVQYLIEEGANVNAESPGNTTALIHAAVHGHLEVVQLLIANGADLNVKRKGQFPALTYAIVNGHTESAKLLIRCHLIANLNMSMPRLPHPTQIPELSSYWYDCKDELNKMKEEDSELYNFLVSKGIDDQVRTWKESETVQNVSQDRLNIEYSIYAKDLTGKIELVIFFLNNREIINSLSRYYEVGIKTIDQVKRLLDRFTREHVEFEIEIVPAQLNFNTKELQPSKLKTLSFAQMINNHAGLFSAAKSGQLETVRYLIEKQKEDIDAADDHGRTALMWAAGSGYLEVVKYLIETAKANVNVKDNYENTALNYATRNRHLDVKEYLKGYIQKELRKKYVCIGVSGTIGYVAGMTISCSAGAAIAVCAASATVSLAL…
243056	243634	+		x		x	x	x		x	MRLLIKKGAEVNARDKNGYTPLHCAVFAKSLENVKVLLREGAEVNVTQYVTGCTPLHSACKIGGVEIIKELVKAGAEVNQLNKYGATPMYYIWESEKYCLCDSKESEKASKFLREKGGVTKSRELTCYGIERLVGEIADMLNGSYMPELKIIEIGEIRKRDKSLIKEECENLASKIMSQVSEMIDEVAKRNT
243673	244170	+	pk2 homolog	x		x	x	x			MLKLGKFNKSAKELLENSYKNIYARDENGRTALHYAINAKTVKLLVEKGANVNAADARGYTALHLAVTEKRLETVRELIKSGGNVNAEEYGSKCTPLHLACMVGEKEIVEELVKAGGEIEQEDTFGMTAMDYAKNSKEITKVLKKEXDRIEKLFEQQSGKSSMRG
250837	252318	+		x		x	x	x	x	x	MSAKLSLELIECLINQPGVDVNVRGLNGRTPLHYAVEINELSMVALLLNRKNINPLIADDDGKSALSCAREEILQALINHKYGSEGDSLLHLAAMLNEANAVRFLLNKGVNVNEQNALLHTPLHLAAGAGHEEIVEILIREGNADKDVLDVRNHAAIHYAVNNKKLEVVKLLSNLGANVNIAGSGRNAMKLSSLHVAISSSNYDERDLCLDIVRCLINVPNAGVNLQDYENKTPLHYAERLKTIEVLLTREDIDPLIKDDNGKTPFCYAKEANRLDIVKILASNRYGADKNSLLHLAARKGYEDLIDGILGEGVEIDAVDESGKTGIYVAAKHGHFNVVKLLLKRGADATDVFQYAIITNNAKLIELLSKEKEIVLFGRQKNFPTFHLLSNKYFEERKI…
256096	257415	-		x		x	x	x	x	x	MVLDYAKEGKKAEILQALINNKYGSEQDSLLHLAAMIGEVNAVRYLIGKGIDVNARNTLHHTPLHLAAGIGHENVVKILVKEGNAEIDVFDARNQTPMHYAVNNKKLEIVKLLLKLGADVNSARIGQNSMKLSPVHIAVSNTNYDERDLCLDILKCLIKEPNAQVNLQDYENKTPLHYAERLKTIEVLLTREDIDPLVKDDSGKTPFDYAKPEIKKALMSSKYGSEKNSLLHLAVQTGEIELVESILKEEIDIDISNNKNLPPVYLAAEKGHLHVVKLLLKKGANYTPVLHLAIKSNNLELLKVLFTEKNGSLLCRDTVINFPTLHNKYIAQREIADKRMKKHNNIICIYTTVSAIAVAVYIGLITTTISSAIIFATITGVFALVIAIMISEMSKRYIE…
257405	257596	-	DIVERGENT (possible frameshift)								MSANLSLELIKCLINQPGLDVNVRGLNGKTPLHCAIEFDELSMVDLLLTKKNINPFVEDNDGS
257851	259920	-	DIVERGENT								MLKTSHSVDYFKQAVNRSELIKDTLSSSSQQIPIDLDLPEDFIIGESIGEGDCFFDAVAQGLNQLKPLGTFTAKSLRKICKIFAKSQFGLDSSWLTEALKNDGGSISSYVQRIEFTADDIKKGYRAIDRLKLTTATWGLPEIEGRIICIVYKVRLHFIKERITCNGGNVITHHLIDREGYQKGALDRDILNKEVYYRGDTIHIINRGKFHFEPILRKQMLPNCYNIRPSEKKLDSESICFQQNSEAEMKDVTDNQMDYEYYKESSPGIEVLPTESTIGATVDYEDRLSNEELQCVRSQESPGVTRSSSIGSSSTSTDDEEMFSCISITSDEIKEKMLFFVRVFVKVFEEKYSQISQEVRPDSKILKTGKAVDECTSAVNDTIAPGLFKFALQRVNRFMG…
264551	266944	+					x	x	x	x	MVMSYEQWEIILGIVDQKEDLSKDNVIEKIKELLNKARILERKEVLRMLEGISHKLEISNEIPIVQETPEPLKKRLKVQHIPQTLEKSEKILKEQGVSDAQKILKRVLKKLGVQETSEKSKAVTTEDVLNVRKTSEKMPVMLDTQKILEAIEKLKKASKDVYHEWKKARFNVNYWFTLNYDIHSGYDQYGLLCLAMDFNLMNVFNALCKAKGINIHSKGPFSQWNVLHWATENSNAKMVSELIKNGANVNSMDSSQRTTLYQPAANGDIEIIKILVKNKADVNAEDLARLTALYEAAGHGHKEVVKYLMKNGADVKRNGALKLTPLHLAVANVNKEVVDCIIENDENIGKNIEKVDVFGWTSLYWAAAKNDTPILKSLLHAISRCRASVDIEDMLLGRT…
271198	272574	+					x	x		x	MNPEELKEILAKKERVNAVIKDLVDTVTKNDLEKVKSIFEENSSIIRDVVTEVNSQSGTNLLKCSTNNKMAEYLIEKGISFSAAVTKAVKRRDLESVKSICQINSLIAKDELSQNPEPLESATYDHKFNDKIARYLIEQGANPNATDHLGRYLLHLQTAQGNFEGAKALIENGADVNLINQEVKSYQNLIIGGSALKGQTALNFAIRIYYRHKDIDDQKSDKTLKFISYLIEHKANLNIKDCNEMVPLDIAIFHNSPKIVELLIKAGADLNVGRKKAEGVLKYAITEGHIDIGKATIRYILEHDSHWLTTSNKPDLLNDQQELSNYWDEYKAQVKEPHDIVEDRIDLTGDGSTRPIMRTVSGFLDHESRKNLVKSSFISSAEAPENFCPRKLAVISVAA…
275250	277790	+		x		x	x	x	x	x	MEYERLLKILRTISDLNENNIIERVKEELEKEDPDTYKKWQDNGFNINYRFDDQNTFLHIAARNDLVKIAELLIKKGGNVNTADEDGWTPLHFAAACGSIGVVEIFIAHKVSVVVADEDGCTPLHCAAHNGHKEIVELLLNKGANIDAVNKVKITPLYAAVRFGYTEIIKVLIANKANINAADEDGCTPLHCAAINGHKEIVELLLNEGANVDAVNQVESTALHYAVSSENCQMEIVKAILEKGASVNVVDEYERTPLCWAIRNGNLAVVEVLLKEGADPLLGHKSFNTLKLLVESIKNDFKHPKKAEETQQQEDDEYELIKYSLLHDCSLIDNIERSAFSKLIPMWLADGSNLTENQKELNRKFLTIIKDFPHITYQDYNNDIKKIKKFLLDHKSSQD…
295972	296505	+					x	x	x	x	MDKLGQDTKNKLHFWWLITVIVCIIATYSYMRAKAVDNYKTILRIASQNCNLETVKFSVKNLLDIDTHMPKLTALHYAAEGGCLEIVRFLIDEGVNVNIINKYGSTALHNAAYYGDLRIIKFLLEKGANPNIINDDGKKPRNVAVLRSRHNKDKPYDQIIKLLAEAEDQYESTKSNH
335555	336475	+		x	x	x	x	x	x	x	MEIMTLDDFLKMLEEINDTSGLSKNNIVERIKIKLERIDLRRWEDSGFNINHIFTTHSDLDPVETTLLHFAAKSGYENIVIALIEYGAYVDAWDSDGCTPLHFAAEWNHKGILDILIESGANVNAWDNDVCTPLHLAAEGGNESVVRALIACGADVNAQNSDGHTPLHFATKSGYENIVIALIEHGAYVDAWDNYRSTPLHFAAESDNEKIVRTLIEHGACVNVWDSCGRTPLHFASDHESIRDILIESGAYVSKQNNNRYAPLHSAIEWGCKDVISSLSGNASPRTEMAVERVEQITLAGRLELF
343928	345124	+					x	x		x	MRDSNYVREPIALFQKIKENKKSSDLLYNLKSAYPEKLKIGAAIKTGDCFFDSVAQGLNELNIKPDHYFTAKSLRKDCADYVEQHGEQDSWAYKAVIKDAAIGGYFVALEGPYGPIQNPKTKINMIDEKKTFHEYLKNIKNMATGAGSAPIWGRLEIEGKMICEKYKVKIEVIALEEEPIDGRYITTGEEGEGDKVVRIVNYMRHFVPLLSEISEDITESQPVSNEEIFGEVTEASASDQSEQEEQYNIRTSKAAIAQDHKEQKTQKERIDTSASEPIHTDTVITISHPHEQKTQQEEIQKKLINSYRREAIYSIAAVITAIAFTASAIAAVFTQPMPLACFAGVALVVACICAYQLTQSHQDINELKGKVGENNTFTFLEETGFKIYSLIDKAASKI
349764	351104	-		x		x	x	x	x	x	MACEEDIHQLVESGFDINSKDVSGVTLLHKFTKEGDLVGVKSLLEHEADFNVVDNENRNPLHYAIMHGHKKIAKLLVNQLTINSRDKNGFTPLHLATLQDDTELMDFLIAKGAKINEKDAEEGYTPLHIASLYGSKKSVQILIDSGANLECEDNNFRTPLFLTIYQCTTHYESRAEIIEYLIKKGANIEAKDAENNTTLFLAAYNNKMQLVKLIVKQAKARLKEFICTKNKHGFDALDCAIEHNNGKMVTFLVSKGIEADDQDCIGNTRLHKASYNGDTKAVKFLLELKVNVNAVTRCNRTPLLLAAKKGHVEIVRMLLAVKANMNICDQQGFTPLHLTIQRDYFDIAQLLIEKGAIKCSKDYTAIGMFIDKAHSKKNIEENYKKFCRFLMLYLKELHS…
351355	353136	-		x	x	x	x	x		x	MTGEYESLEKVLRTIEAEKDLNLNNIIEKIQEELKKQNQDLHEEWKKVEFDVNHLFSQELTLLHVAARRGFENVAKVLVAVGADVNKKDSKCEKIPLHLAAENGHAEVVEFFLNRGISVNVMDKEGNTPLHCAANNGSRKTISILIRKNADPWLKNFHGKTAVNIYAFEHPNGSGYLMQLKKAKIQGYIVFGSMLLLGAAMATSIVAVNLIVPDVPVLKVLLCVSILYAFASIAKYITYKAAELDAENEIKNGQDSNIINIEEVSDEKKSVNKATHSKELNDLVCAIKGSSRIEIVDPDKQKKVTLDDVIVSDEVRKELKMICGHISEKKKKALEMLSCKMPTGYILYGPPGNGKTLIARAIACEANAKFISVSGSECMQKYAGQSAHYIKDLFAKARE…
454980	455129	-					x	x			MYLALLKQILSIVNRENDLNGNNIVEKIKEQIKKEAHLLMKNGRGKNLI
497388	498461	-					x	x	x	x	MFSTQSLPVENILLHQAAYNGNINEVRLLLNVKTDINIKDKKGFTALHFAVYSGHLDVVKLLISKEANIHARTTKGSTVLHFAVAAKSKAIVEELIKAGADPNIKDCTDGKTPLHIAAQNGLVEVVKVLLNTQEIEIDAKDNEFGITALYLASQNGHTEIVELLISTKNADVNIVDKKNNVTPLYLAAQNGHAAVVKLLLDNGAKVNGCDTSMNPLCVAIDNGHDEVAQLLLSVEGVDVNIGNQLGNTPLHIAAMKGNEKMARLLLEKGADPNIKNLSGDTSLQAAEYIRKISWHDNPPNVQGGFFVLVGSNGIYSFQQFYEQKKIMELLVQHIKDSRPSSSVDEIDVSVQQSSKIR
511091	511642	-					x	x	x	x	MYQEQENSVSNSRFTLPHIELSLRAKQDTNPTDNEGLVPLHYAACGNRLEQVKLLLKNGANVNAVDNYGFTPLHYAASLNCKEEVELLLKNRADIDVKNHFGATPLYLAVQGGHENVVKLLLKNGANINITDNSSKTVLHLSVLKGHTEITKLLLGDMESPSTSCSDISIEGLQVTSVVLNKT
511770	512771	-							x		MNEREQRELDELLMNSSKGENIQQITELIEAGANINAVTTVQKETPLHIAVRYVHKEVAELLLNKGANVNAVERRKWTPLHTAVKSGKVEVAELLLDRGANVNAVDNIDMTPLHFAVKYVQEELVKLLLEKGASVNAVDKKGRTPLSIVATGCYQGYCDKPMLVRTIIVYAVLHSGITMKPECIVNNSELSEFWDLCKNEVSGRLSNSTISLYQFLRENDKNKLAGYLFDQNYDVKRYLEEKQYEKDFPIYANIITGQLHKAMKRKDLLYRSDIVMNHSVDLKDFPQEVKSKITNCLTNEELRNVIRAPFSIPSRNLDNPSAEQLQAAAQAHN
535257	535529	+			x		x	x	x		MTIKFAKWKRVLSTVNGNKDLSKDSVIEKIQEKLRRFPKDYNRWEKDNFNIDYLFRINSDYNNSNEEVALLHLPRSFYLLDMGYYISLLT
535613	536242	+	DIVERGENT								MAAKLGNIKLAKVFIENGANVNVRNECESEDTPLHCAVCFGHIEVAKTLIKNGANVDAVNKNGNTPLGLATQENQVKLIKILKESGTNVDEVNKNVYIPLGCAIQNYNKEVEASLDDIIKESLKEKEKIQQVTKNVIIAGGTTALLXTAIAAVLFATETIAIPIAIAVVAVIAVALAVGGATYMXXKXSXKVDEAVLTNVHEISVLTAS
546224	547204	+		x	x	x	x	x	x	x	MFMKYKAFFILLIVISNLLAAEQPEENKNESSINQEDVSKSNTDAEKTSPLLSELKESTDPTNVINEEVPSSNQTNLQSEEETNIKDTKALTSPLSEEKKEEPEEKKISHNNQTNLQPEEEISKKDTELSTSQLTEKKKEEQPDNITPVNKENEESEKWTKLNKEIKKHKSKSIYKRQYDSLNEHLPKTISTDDYSKQFFYCIKKGNLICLRGVINKLEKIGLTIQEILRFRNKLGDTPLIYAVKQGEIDTVRFLLLQGADPRVVDNNFKSPIEIAIERNQINIINAIAEMMPYLLEDKEINNQENSEMYNFAIKTKENTCDAKDN
549849	551930	+		x	x	x	x	x	x	x	MVIDSSVLVSNANKLDKCINKNEKPEQDKKDKQLYNIIERKVKKEKHKHEKPRSRDGTLKECKRLLKEGASPEVLIKLEASLREQEKYYRYYIQCFLPVLGEVIERSKRISNETKNQVISEITKSCLSRYNEQDSGYGSDFEDEINGISDSDSDFKDEINGISDSDNDVQLLNAIQNGNNRKFRKYLKDCTNVSGITDEKGNNILHLIASLKKKQKCKFLGTLIKTITKEDLAQLVDSENQEGKTPFQVALINKIIKGKHNSQTIQDNDNTLKFLTKLLEYGASSDNLGLSTKELQYLKEEQKTYYCDFLEKLAKSVKTPELKSEIRTKTKEIIPHTINTPDSNDNYQLHLAIKDKNEKSFKELLQKGADINLKDANGNNALHHIALLRGKQKVTYLKL…
562168	562437	-	DIVERGENT (contig boundary)								MYTDEQNKNLVRVEVKDQERLKKLKDCGEEIGKICLLGGYSVYNAIERGYFERPLGIFQGERLQSGEKVSHVDQLQRRKNNEVYQIRSP
580657	581688	+					x	x	x	x
596662	597831	+					x	x	x	x	MKKLERLRKNLFAAIDELNIKKVKRYVKKARYINKEKEIINGKKDGMAPIHLAVYKGSLEIVRFLLKNNANINAVSDGCLVPYSYVTAMNSKTEIKEMIYHCTSSTNSQVMQGFTALHLAFFYCRLDIANFLLNNKAIDLNISSANGKIAFEVIPGYESLCSDGCDIKKIFLAVLRFHKNNCTELLLSARINTKLKLEAGDTTDAASSTASLSLSPTKAIKMELEVSNTTDLASRTVNSSFTLIRENFEEVSSTASNAVKPSSFINSIFSWMGTSTTAALSSLFQSAPALPSAQQSVDHLDGSPIGSSQVDFNGTALLTDVIVRKLTGKKYSKPLEDSLLTIQEIRERKLNTIEKNFETALSKCEKLYQCPESSLSNLTISKGMHQKSL
601143	601730	+					x	x			MVTKTEVEKWRDGLRSAVKERDFQKAEEYIREGKKHTTNVINSKDRNGNSPLSIAVSKQDLEMMGFLIENGADVNIEDFFRVPPIYYAVTKGTTEMIELLIDKKASISGYFSYAGEKRTLVGWAIDENSPKKVEVLLKHGASPNSKFDFYDDSQDSCLHAAIRRDYKKIVELLVKYKADVNVQNERGGNTYIFGY
601684	602325	+					x	x		x	MFKTNGGETPIYLAISSKRPKIIKLLYDNGADIDNVKNIRNETPSDYVKLFYSGKTIKEIAAEAESANVNSEDITPAPSSAVRPSSFINSVFSWMGTSTTAALSSLFQSSPALPSAQQSVAHLTGSPIDFSQVDFNGTALLADVVIRKFIGRKYSRPLDDSLLTLEQIRERKVSAIERDIKMVISEFEKLDQCPRSLLSNSTISKGVCHQKSL
631361	634798	-			x		x	x	x	x	MKFKTNSEYYKSQTLIKKLFPNKESIVINDQLTIEVKYGGLASYTPEYIKQTVKDAYGAWSDNFYSQKSVHSGPVKLQLYVLKNYDDYKAHIKELSGGKDHRELWGGGTVRAHEADGTIAKTFIVGDVNGLLCAKSKILMEKMSDAFLEYSTGNMETVPEVLRTGMKLFMWSYDAAKKESTRDMHYTKEAYNKMHESGHDTPYKIASMSNDYRISDCLVTFLQEKHPQFIKQLLTEMSFNRVEAISKFKHLLNNSEVEKEFKQWMDVKSGDKIVADLVPDSEVMTFGEHKLQINIKYDDEELTQSKLSSVKNAIESTIKDFDSAFGINNSQPWHNIPNKVNVFVFNTKSDYENYLKELNVNYKGASGLTVQGRGSEVHVYFYLQDQFDDSCKTLKHELG…
638490	639212	+					x	x	x	x	MQEFLNKNIEIPIDKELFKSALFTKDIVDIRKEMVYLILQHCIVYDSTRSKKEEILSFKNVMKILDEAVNKFVTPQYFYRLINFRDQSGNTLLHQAVINNNTDAIEALLKYGASPLIKNKEEKIPLDLDQEEKTREALIKSMKDQAQSKKESARCNSLIGIIPGVFLGIGLGVGGALVPSMTIILCALAVSALVAGIAVGVAIYFLSQDYKQAKSIEEAVNPQLSSVEHEKTADNKAVLG
639691	641085	+					x	x	x	x	MKGEINAAANFQSEDFVSKNTDFDCLANPISASNAKLENSVKAKDKKNEAPFFSRRGSSHVLELFSNENVEIHIQDKMPCAARSESGIAGIFRGIAGLFKGRNSMNVTLYQSKVQRSSAIDYSTTESIGSRLLNICKGEEDISFDQEINFLYKEGCLYDALLLQEEKNQDTPLHLAIKKNHADFVKKLLCILKEPYRANEFYKHKYFQHKEENEKPLFKVINTKNKDGKDAITLTIEGNNSECISALFNYLTDKNINRRKDVESEYTPLHEAVLLNKNEAIKELLKSKDIDTELIDKESYKAYNYTNNKEAIELFIEHYSNKISKLRIKLEDNNKKLARIKCVLNKTKLTCVCLAAFGSCFRMYRNSHDIINEEVSEDMLYYSLALLANTTGLILFFNY…
645139	647592	+					x	x	x	x	MGDWNLSAGLMSPAVDTAEKEKERRHSRDSGNESQEEVSVDNSDTEDTPSNGANTLKFQLTQSLLSQVKASENNGDANSGKQAYKDLPRMDFVINGQVIDKNFVSQLRDKCNQNDQRQIAKHVFTKMFEHAKAEIPNDNLLEELINSCNQAGYDGSLLMQLSPIFLGHDLQLPDANDRHIEIVCSDQDSLNIKYCPNMPVKQLDKEICRVDAILEFTLKSQDGKVEYEDGKVTLTIPEKLKNYKVDGKSLLDDIKMHFEDVDNAIIESLLENIDEGQNSFVVDLSTQVNSDSFDIIPEDTVFDLGHIPELVKKAVDDKDVNALADHIGFFQDHVTHVSSKEGLPVVEKTLEIVSGFTKEQSKPWRCYPTVPIASHIYSVKQQYYDGYISQEGYEKLKKM…
659493	663110	+					x	x	x	x	MFKNTVTSVFKAKSSTSAKTLSSGLFVAGNVVMARAISEIDLSSLQGNSEDKVNKQDLIIIYDYINKVTQEENYNICTNNLDCIKSRILAENISDSLAEKFRQDGWNIISNDGSSLLTVAIERIRKEQKKNRNYDIHVEIAVSLILSMGRELIIKLENFADSNDKTLLHYLAESGKEDILCFVIENSNFDIKEAVRNKDRDGKTPLHYAAKSGNKECLKILIENEADFSCTTNNKTELHYAARSGSPNLLEYLKEILTAKGIFDREKIKTDKYGNNALHYAVQSGNAECIKFFIDNQVQFLKNKYNENPFHKIVGNSETQENAINFLIEHLKFLGRRKSEINQENVDGNTPLHIAAKHGNNQLMKLFTQSGAKIVQNKQGNTPLHIAIIHGNSYCIDLF…
763815	764669	+		x		x	x	x	x	x	MGIVDSFLIKSARNSNIRGVRLALSLHNIVNIFEKLFSRINPFRNKGSFDLNNDQTLNRALEYAVTNLDHNVITLLISAGANINEINNSIGNVILQYKIASEAMHYGDKDSLKDRKEKCCLVLGELIKKERKEILEILKQTESCDKLKEEVELKFKANSPKKPPIIFEHDDILLLKEPIYDEVYDAKVSNSLEELSVSEESIYAEVYDSHKRSTENLSLKDSGCSSISGEPIYEDVDDFSEQKKPTSLNHKEQPEPIYAKVDLSKKRSERQAKHIKDNSGTYHG
764707	764946	+	DIVERGENT (fragment)								MSKVLISQRVKTKAGFNEKEIRQNFERRDSGYDSGYDSDTKVEQKLELGSKAPKSEIGSVNIEHGVIGGCRYKITTLTV
818988	819275	+	DIVERGENT (fragment)								MFSIDQWLLDESIPLHTAAFRGEISKVRSLLNAKIDINIKDRAEFTALHKAAYSGQLDVVKLLISKGADVHARTIEGSTPLHSAIMSENKTTVTL
820045	820473	+	DIVERGENT								MNGIQQVKLNEQLFSAVLSNNIEEAERLINAGASVYSVDKHGRTPLHHAAQRGYVDLAEYLIKIGTDVNSVDNFRNTSLHLTAHSGYIKDNGVWVNIEETAKFRHKNTVELLLKKKGQILMQRTIRCRLLYILQQKEDIVIC
820467	820811	+	DIVERGENT								MLEALLKKGAAVNLADDERNTPLHCVGGMGGGEDDKEVIKLLLKAGADINLVNAEGDTPLSSYDLRSSHLSTDMKLMIVHITKLKAAGLFINQQNIQFTDELVRFWRGRNNNFL
826275	826832	-	DIVERGENT								MIEGIKIDERNEHGFTPLHNAVHKDHKEIVEVLLQAGANVDAQHLYGTPLHYAVSYCHKETVDVLLEKGANVNAVNTHGMTPLDYAKGQNVEVLLKAGGRSFVKAFNKGIATAVKTALLGTAIAAVLFATETIAIPIAIAVVAVIAVALAVGGATYMMLKPSTKVDGVAVLMDGRQEAASAARFA
828234	828713	-	DIVERGENT (contig boundary)								MAKGYETLKKVLNVINDKQDFNKDNIIEKIQEELERQDQDLHKEWIDEKFDINHEFTSDHPKYLKFTLSRIAAEAGYANVLDALISSGSNISDKSRKGWTPVLNLAAKHGHIGTVEALLKIVSQKCDIKKTRGKDNPTHYRNRAITGVCDRXXIGITTVX
864278	865132	+					x	x		x	MAMEISNWHELLSLVNVDKDLSKDNVVEKIQNELKRYSKEYEEWEKSGFDINYVFKDGEKVTLLHLAASCDLENIVNALIEKGANVNEKGAGGETPLHEITHLKSINIANILIKKGADVNSIDMWGETPLCGAVLCDNMVMVDVLIKEGADVNVVDTFRRTPLHWAALRGNMVMVDALIKKGADVNSVDMCGETPLHYLNRPAIKKGQIAAGAATLLGAAISVALFAARTVTAEFIPIVIAVVAITVAALTVGSVTYKLLKPNTKVDGVAVLTNVHEESASITL
976062	976928	+		x		x	x	x	x	x	MTGEIEKDESPSLYSAIRMGDIEATELLIKSGANVNDNYERNRTPLHIAIGYKQFEIAKLLINNGANVNAKTGNHGKDDLTPMHLAIFADTPEFIEFLASHGALINERESTEGHIPLHFAALYGNKSVIQALVDKGQNIEDIDNNGRTALFLAIRQCTEAEDDSRIEVIEYLINKLKADITKKDNNNNTILFPAANNCLGKVVKLIIKQYIESFGRDRLKNFINHKNKAGMDALDIALNSGNEKAIEVLSSYGADIENKVTPKITVEKPNSTLDGAESIEVVSPIKQK
1062147	1063019	-					x	x			MAAENGYEGVVKALLTAEQVDVDRYFSALYFAAANGREGIVKALLTAEQISVSEKDSFGKTTLHWAAERGHIEILNTLLGKKASVNIKDNYGETPLHYAAKNGHIEIVKILLAVDGIDINVKDKDEKTPFDLAKTEEIKALLLQIIEKTDDSSASTDSEGDQEEDTEQEGNVQPVIQVEEKSQEIIVEEVSDVQIEDADNGHSIDIALTQNGVNPRSESSTNEEQPSSFFDNLLNIIMKPFSLIASFFGGFFSWLFGSDEPSTESDQIITPSNSGGEELTNYQEGDNNII
1063079	1063537	-	DIVERGENT								MNYSVRDIDSKLLNAAERGDIDKVKHLINEGADVNAKDVYEKTPLHWAAEKGHKEIVEILLKKGANVNSVAFLDITPLLFAAMEGHEDVVEILLKRGADVNGVESFSGMTSLWLAAQNGHESLVEVLLTAEKSILACILKHYVLLLEMAMKA
1111237	1112559	-					x	x	x	x	MAIEKEKFFEIINEVGESSDLDEDNLLEKIKNELKGKDAGEYNKFSRNFSKEHQFSIKISEEAAEDWTLLHLATACNNMLIVELLLKKKASVNARVKDGSKNDGLTALHIATSCGHESMVKQLLSDDRVNPSLKSKNNTPREVVGNTENKEAILQMLEEAEENFYVKHKKKTDISADVINSVKQYNTIRSSEQAPITCGSSDNIVSEQYLHAGVKNIVEKFESPQRGSVTCSGKQTPIGESVSSDDSGLESEATFDTSFCSEINHDGTANEVDDQILESLQPQIQLQDRQIRKLEKPGKELKHVEKELEKLKSDLAGHETRLEIFDKLSEENQSLKQKIKDLENENTTLNSELSKTKANKVLLEKTQLSFLKIASVNFVTMLTVSIIFSVAFQLPILLM…
1117815	1118873	+					x	x	x	x	MDFENLKKILSAIDKDASVNKDNVINKIKEVLRREDTIAYQEWENKNFSINHTFIQSDPDAEFTLLIAAAAAGCEDLVNVLLDRHADVHVEDENRETALHHAVYSRCVGAVNALLKKGADVNVKDRSGSTPLHYATIYKFIDVVNVLLKTGADINVKDRSGSTPLHYATLSNHVEVVDALLAEGASVHVKDGNGSTPLHYAAKNGYLEIVDALLDRGADVYEKDSLQKTPLYYAIINHQEDTVESIKGFLKNKVVQGSVVVGGLVAMLGNFVTSTLFITETMEITLTSVMVAIAVSASTALTSGYAKYLMSKFDNEIKEIKERQDVMEGRQSLTEGWQNVGLQSIRIHNALS
1159752	1161218	+		x		x	x	x	x	x	MADNLSLELIKCLINQPGLDVNVRGLNGKTPLHCAIEFDELSMVDLLLTKKNINPFVEDNEGKTSLDYAKEGKKAEILQALINNKYGSEQDNLLHLAAMIGEVNAVRYLIGKGVDVNVRNALHHTPLHLAAGIGHAEVVKILIREGNAEIDVFDVRNQTPMHYAVNNKKLEIVKLLLELGADVNSARVGQNSMKLSPVHIAVSNTNYDERDLCLDILKCLIKEPNAQVNLQDYENKTPLHYAERLKTIEVLLTREDIDPLVKDDSGKTPFDYAENRPEIKKALMNNKYGSEKNSLLHLAAQKGVVDAILKEEIDIDILNNKGHSPIYLAAEKGHLHVVKLLLEKGANYTPVLHSAIKSNNLELLKTLFKEKSIKLPDEIGRSVPIYYRCIEHRDAKVRK…
1185161	1185628	+					x	x	x	x	MIICVVITYCYTKAKATDNYKTILQIASKNCSLEVVKFSANNLLDINTQIPELTALHYASGAGCLEVVKFLIEEGADINTAKYEKWTALHAASYKGNLEIIKLLLEKGANPNIRDTGGKNPRDVAVLRSRHNKDKPYDEIIHLLYNAEKKHESEQ
1196075	1197247	+				x	x	x	x	x	MATARDYLSTVEKLIEKGADINTKNNYGDTPLHLAAISGHSEVAEFLISKHADVNAKNKDGWTPLDSAAALSKSNGDWVPLSSAAALGKANIIKLLGKENSSEILNLLEERIRKSEEILQLTLQDLQKQGVILSTRVRNHRSAGEEDENSLQNDKIGPNKIGVTSGTSKPSSFINIFAYTTVDTIKGIFQFVSSPFKAAISMEPSKAITVQGIDNNGILLLLDVFIRKITGQKYISTVVQSISPLEAQGYALNIIEEFEKVVEQAALKSGISMHRLNIDYMGVQKDITRKVMSGKFNEISGILNSHLEKACPGREVGCPGKLSEKKFNEFMAKFNKGLDVILNQSTQQILHKRDDTLEVNNIEEQQGPRSYLNNASIQGHLTRNKVKLIS
1212464	1213339	+	DIVERGENT								MEKGANPNAKDYSGNNTLYSAVLNNHLKIVEVLLENTASPNAKNDRGYTALHRAAFSSELRIVEALLKNGADVNKKNDDGRTPLYWAIIRGRLNIVKALLKNGADVNEKNYDGHTPLYLALNTQQYDDKLVDFLIAQEVKIKGYNAEKPEYLPREKHCYWDKCCSEIGRIKAKIIDGTTTLYVILTCKDNELTCYARKGVLQRALENSNYRNEFPIYYNYLKDQCDKGIERLVLSNEIKDVFQGRQKLFLRKDEEKPDIITKLPTELPEAVDTHLENASMNNLKKALEINI
